# Supplementary material
Source: PubMed Central journal article supplement (PMC2634950)
Supplement: 0807557106_0807557106SI.pdf [file 0807557106_0807557106SI.pdf]

# Supporting Information

Mandal et al. 10.1073/pnas.0807557106

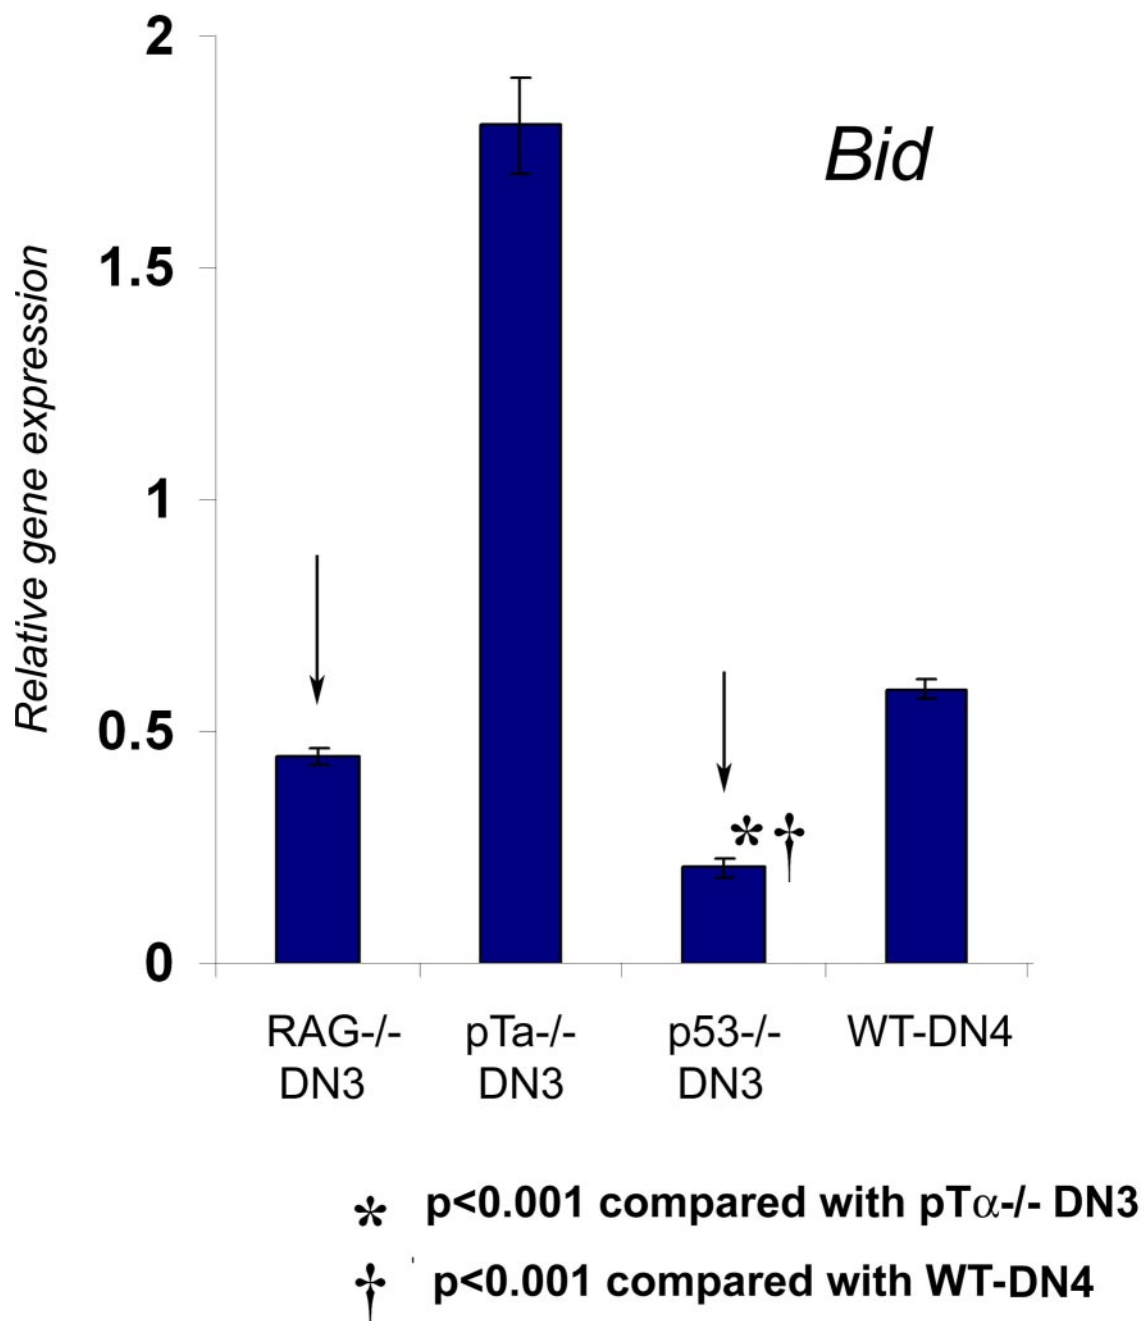

Fig. S1. Deletion of p53 silences Bid expression in thymocytes qRT-PCR by using Flow-sorted DN3 and DN4 cells from Rag-1<sup>-/-</sup>, pT $\alpha$ <sup>-/-</sup>, p53<sup>-/-</sup>, and wild-type mice.





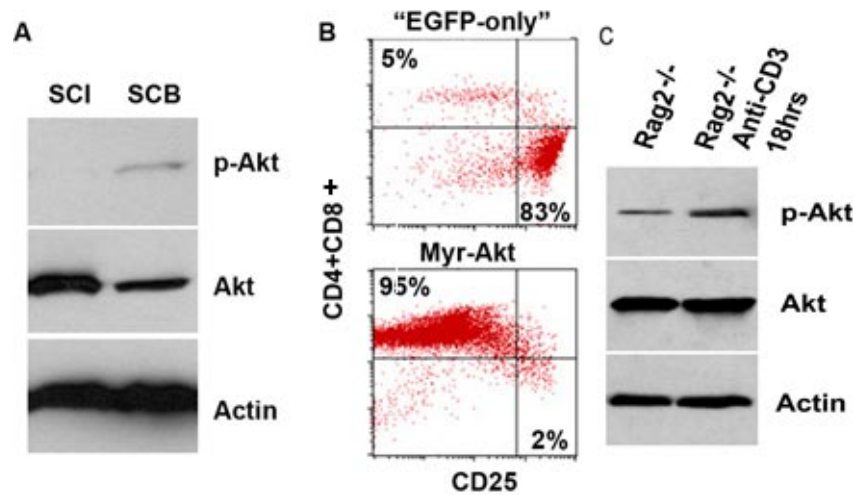

**Fig. S4.** Akt is downstream of the pre-TCR. (A) Comparison of Akt phosphorylation between pre-TCR<sup>+</sup> (SCB29) and pre-TCR<sup>-</sup> parental (SCIET27) cells. Endogenous, total Akt and Actin blots are included as controls. (B) Expression of Myr-Akt in Rag-1<sup>-/-</sup> bone marrow progenitors was able to “rescue” the DN to DP arrest. Myr-Akt-expressing (and EGFP-only expressing) progenitors were injected in Rag-2<sup>-/-</sup>γc<sup>-/-</sup> hosts and reconstitution was analyzed 6 weeks post transplant. (C) RAG2<sup>-/-</sup> mice were treated with anti-CD3 or an isotype control. Levels of Akt both protein and phosphorylation were assessed at 18 h post injection. Actin was used as a loading control. Data are representative of 2 independent experiments.

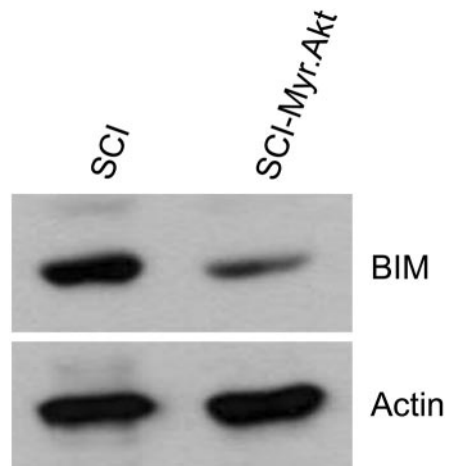

**Fig. S5.** Comparison of Bim protein expression between pre-TCR- (SCIET27) cells and Myr.Akt expressing SCIET27 cells. Actin blots are included as controls. Data are representative of 2 independent experiments.

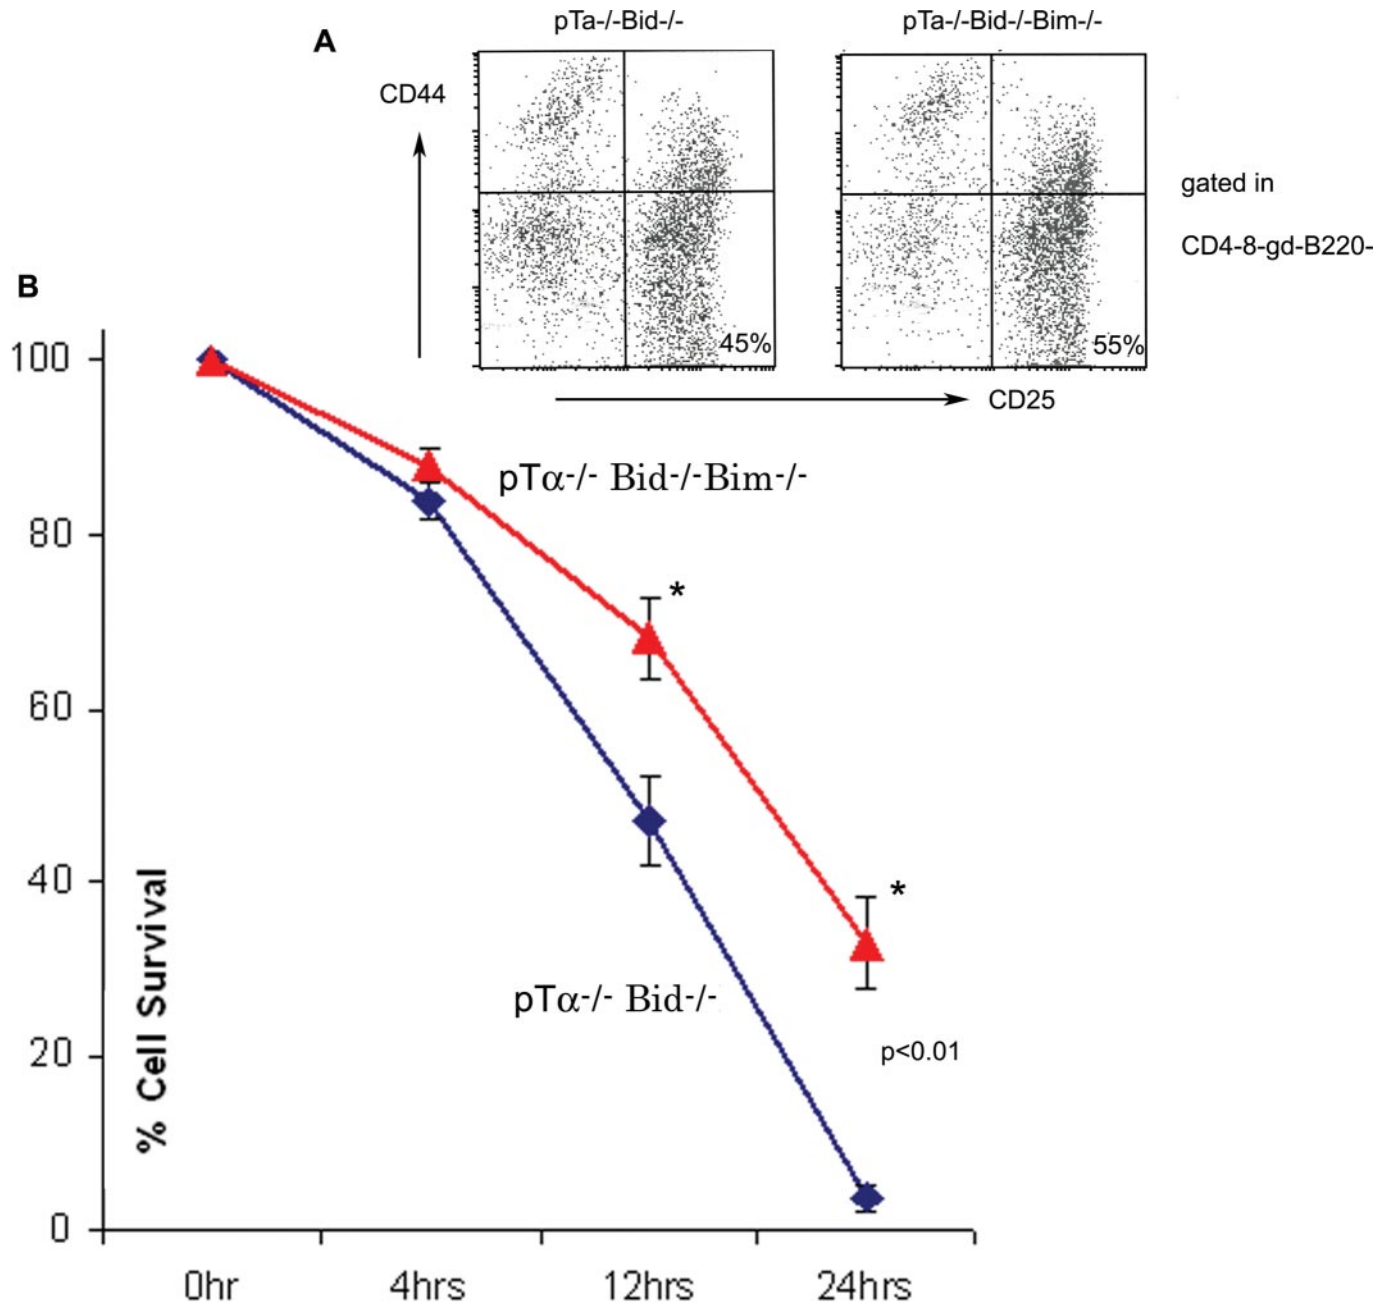

**Fig. S6.** Bim, Bid and pT $\alpha$  deficiency suppresses pre-T cell death in vivo. (A) Phenotypic analysis of total thymocytes by using CD25 and CD44 antibodies. (B) DN3 cells from pT $\alpha$ <sup>-/-</sup>BID<sup>-/-</sup> and pT $\alpha$ <sup>-/-</sup>BID<sup>-/-</sup>Bim<sup>-/-</sup> mice were sorted for live cells and cultured in 24-well plates. Thus time 0 was set to 100% to reflect sorted live cells from both populations. Cell viability was analyzed by using Annexin V staining at the indicated time points. Data represent mean  $\pm$  SD from 4 experimental sets. \*,  $P < 0.01$ .

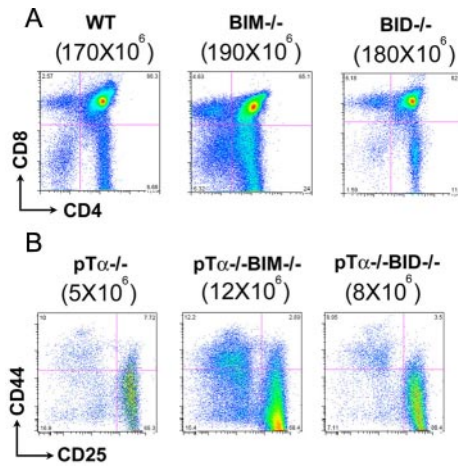

**Fig. S7.** Phenotypic analysis of pTα<sup>-/-</sup>, pTα<sup>-/-</sup> × Bid<sup>-/-</sup> and pTα<sup>-/-</sup> × Bim<sup>-/-</sup> thymi. Staining of thymi of the indicated genotypes is shown. (A) Total cells, (B) CD4<sup>-</sup>8<sup>-</sup>gdTCR<sup>-</sup>CD19<sup>+</sup> cells. Corresponding absolute thymocyte numbers is also shown.





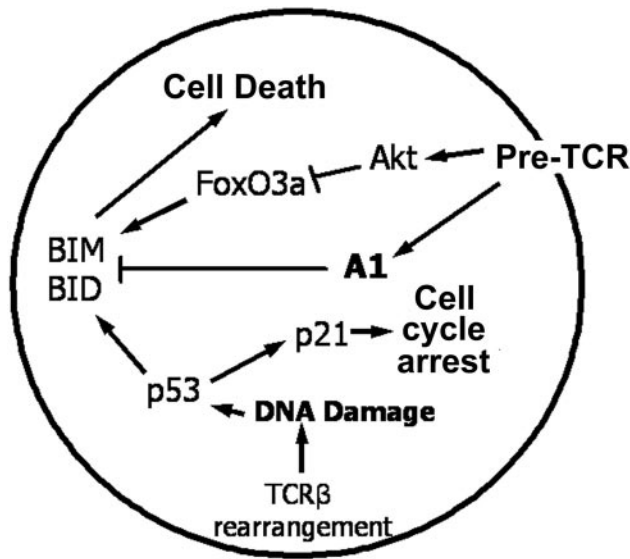

**Fig. S9.** Working model of regulation of pre-T cell death and survival. Deprivation of trophic signals (IL-7, SCF, pre-TCR) sustain the nuclear localization of FoxO3a which is directly activating the transcription of Bim. TCR VDJ rearrangement is inducing activation of p53, which activates Bid transcription; p53 activation also blocks cell cycle due to its ability to activate the p21 inhibitor. Pre-TCR expression can suppress cell death with at least 2 ways. Initially, it can activate Akt/PKB, phosphorylate FoxO3 $\alpha$  inducing its exclusion from the nucleus and thus the silencing of Bim expression. Also, pre-TCR signaling can induce the expression of BCL2A1 (A1), which can bind and inactivate both Bim and Bid proapoptotic activity. Last, the pre-TCR can either directly and/or indirectly suppress p53 activity and Bid expression.

**Table S1. Absolute numbers of different thymocyte subsets**

| $1 \times 10^6$       | WT                 | pT $\alpha^{-/-}$ | pT $\alpha^{-/-}$ BIM $^{-/-}$ | pT $\alpha^{-/-}$ BID $^{-/-}$ |
|-----------------------|--------------------|-------------------|--------------------------------|--------------------------------|
|                       | <i>n</i> = 23      | <i>n</i> = 18     | <i>n</i> = 9                   | <i>n</i> = 8                   |
| Total                 | 175.11 $\pm$ 21.21 | 5.75 $\pm$ 1.06*  | 11.21 $\pm$ 1.41***            | 7.25 $\pm$ 1.06*               |
| CD4 $^{-}$ CD8 $^{-}$ | 6.09 $\pm$ 0.74    | 2.86 $\pm$ 0.52*  | 7.01 $\pm$ 0.91**              | 6.06 $\pm$ 0.87***             |
| CD4 $^{+}$ CD8 $^{+}$ | 153.23 $\pm$ 18.57 | 1.36 $\pm$ 0.25*  | 0.81 $\pm$ 0.10*,****          | 0.10 $\pm$ 0.01*,***           |
| CD4 $^{+}$ CD8 $^{-}$ | 11.67 $\pm$ 1.41   | 0.18 $\pm$ 0.03*  | 0.17 $\pm$ 0.02*               | 0.17 $\pm$ 0.03*               |
| CD4 $^{-}$ CD8 $^{+}$ | 3.13 $\pm$ 0.38    | 0.14 $\pm$ 0.03*  | 0.60 $\pm$ 0.08*,**            | 0.05 $\pm$ 0.01*,****          |

Quantitative analysis of thymocytes as determined by flow cytometry. All data are expressed as mean  $\pm$  SE, which were compared by Student's *t* test. \*, *P* = 0.001 as compared with WT; \*\*, *P* < 0.001 as compared with pT $\alpha^{-/-}$ ; \*\*\*, *P* < 0.01 as compared with pT $\alpha^{-/-}$ ; \*\*\*\*, *P* < 0.10 as compared with pT $\alpha^{-/-}$ .
